# Supplementary material for: Association of a Transitional Heart Failure Management Program With Readmission and End-of-Life Care in Rural Japan
Source: PubMed Central journal article supplement — Circ Rep. 2024 Apr 20;6(5):168–77. doi: 10.1253/circrep.CR-24-0030 (PMC11082435; doi:10.1253/circrep.cr-24-0030), 2024-04-20
Supplement: circrep-6-168-s001.pdf [file circrep-6-168-s001.pdf]

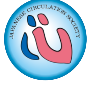

---

## Association of a Transitional Heart Failure Management Program With Readmission and End-of-Life Care in Rural Japan

---

Yoshiharu Kinugasa, MD, PhD; Kensuke Nakamura, MD; Masayuki Hirai, MD, PhD; Midori Manba, RN; Natsuko Ishiga, RN; Takeshi Sota, PT; Natsuko Nakayama, RD; Tomoki Ohta, Ph; Masahiko Kato, MD, PhD; Toshiaki Adachi, MD, PhD; Masaharu Fukuki, MD, PhD; Yutaka Hirota, MD, PhD; Einosuke Mizuta, MD, PhD; Emiko Mura, RN; Yoshihito Nozaka, MD, PhD; Hiroki Omodani, MD, PhD; Hiroaki Tanaka, MD, PhD; Yasunori Tanaka, MD, PhD; Izuru Watanabe, RN; Masaaki Mikami, MD, PhD; Kazuhiro Yamamoto, MD, PhD

Before intervention

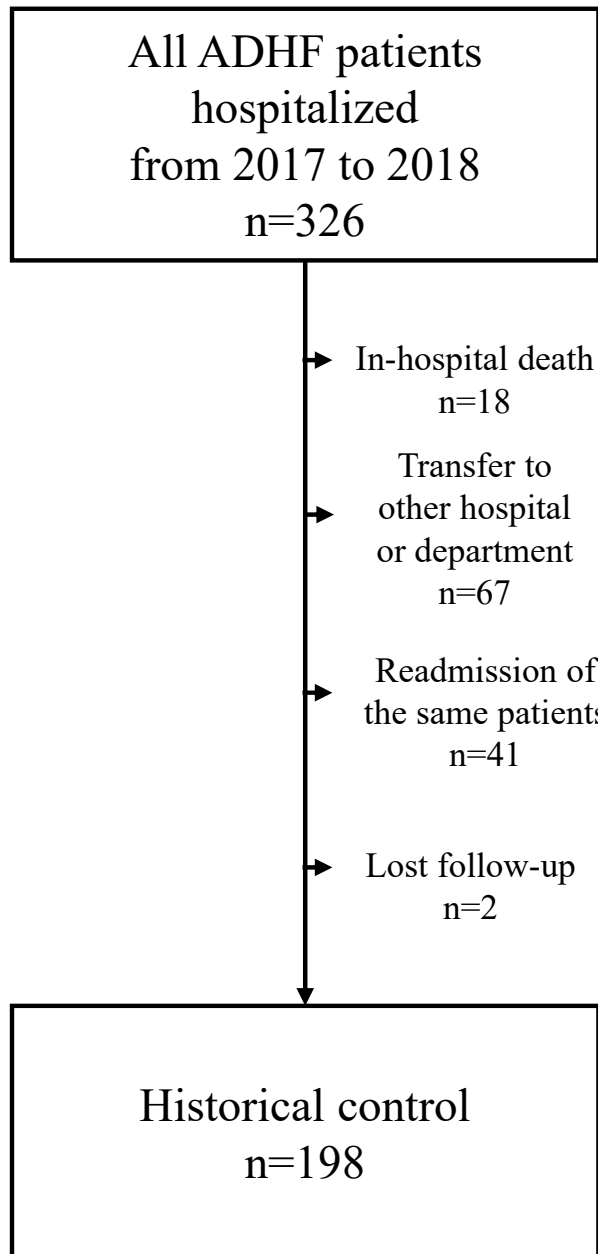

After intervention

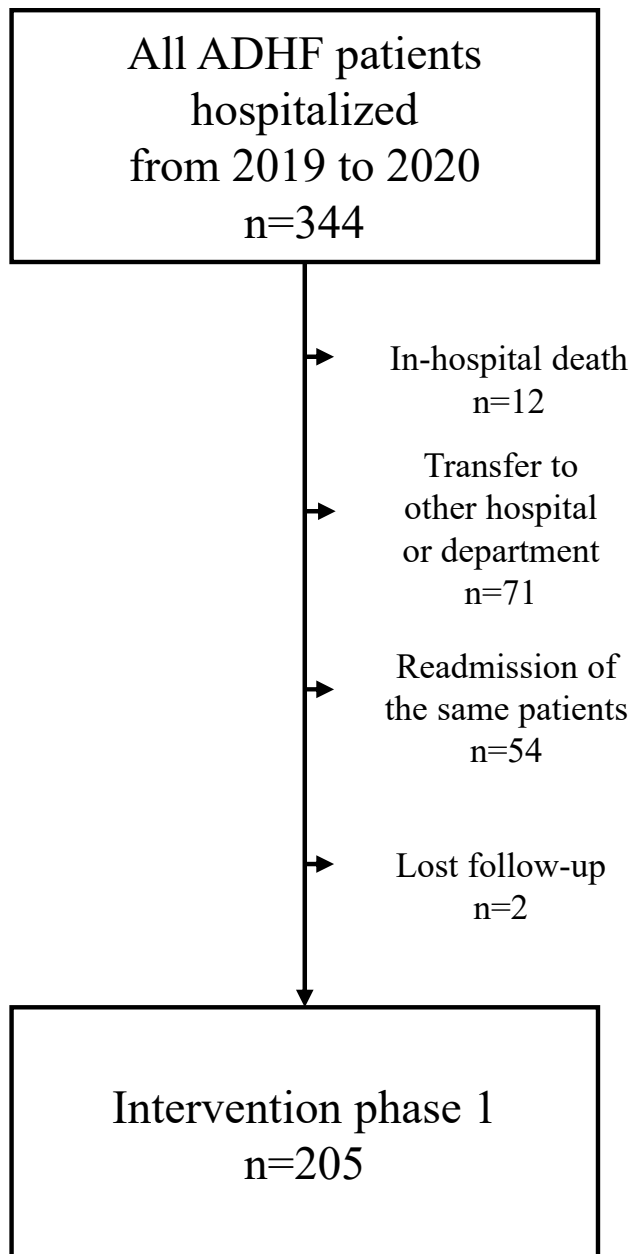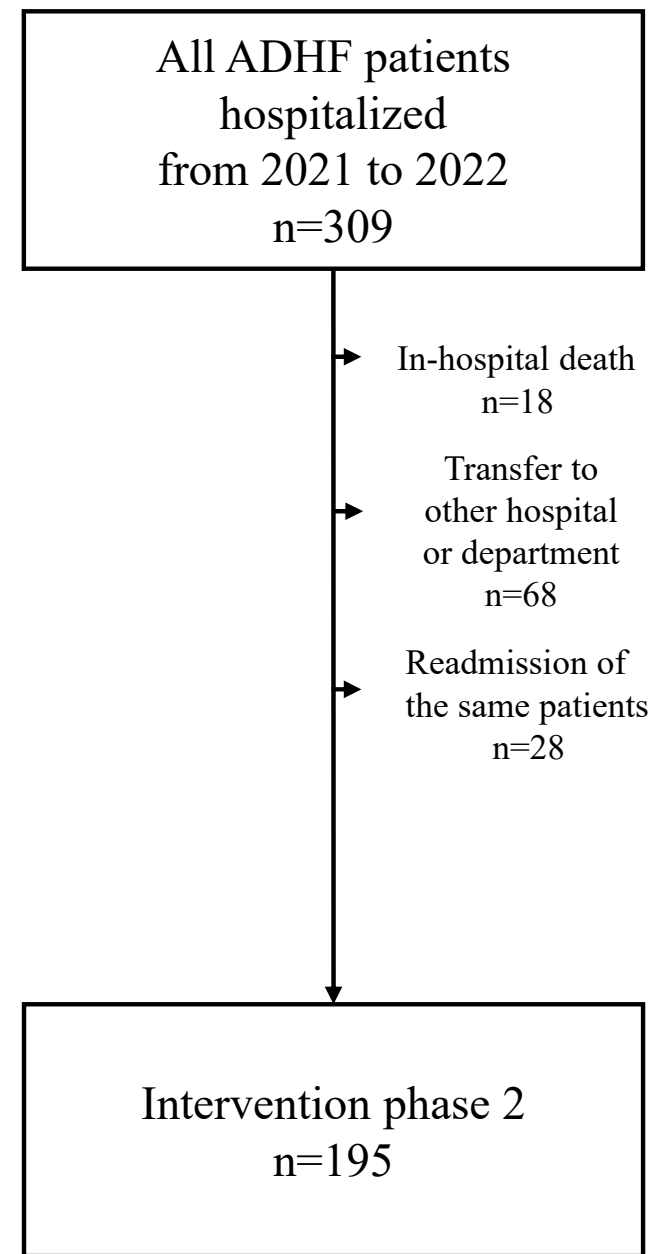

Supplementary Figure 1

# Heart failure collaboration sheet

## 1 Achieving patient's goals ! ( )

## 2 Don't overlook worsening heart failure ! (if any of these are present)

- Stable weight +3kg ( ) kg ➔ ( ) kg or more  
A sudden weight gain of 2 kg in one week
- Worsening of shortness of breath or swelling
- More than twice the stable BNP ( ) /NT-proBNP ( )

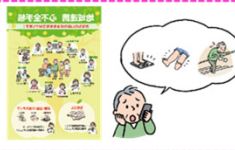

## 3 Patient education to prevent worsening heart failure !

### ♥ Don't forget to take your medications !

- (  medication bag  single packet  medicine calendar )

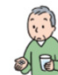

### ♥ Balanced diet !

- Active intake (  fish  meat  dairy products  vegetable  seaweed  potato  egg  soybean  fruits )
- Reduce intake (  miso soup  pickles  dried food  Noodles  soy sauce  processed food ) ◦  delivered meal
- Water restriction  None  Yes ( ) mL/day or less

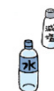

### ◦ Important point ( )

### ♥ Moderate exercise !

- Balance exercise, difficulty (1. 2. 3)      ◦ Thigh exercise, difficulty (1. 2. 3)
- Calf exercise, difficulty (1. 2. 3)      ◦ Endurance exercise, difficulty (1. 2. 3)

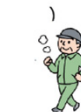

### ♥ Reduced alcohol, No smoking, Infection prevention !

- (  reduced alcohol  no-smoking )      ◦ Recommend vaccination

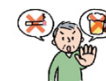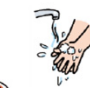

## 4 Supporting everyday life ! Fill in the person to be supported

1. Heart failure handbook records ( )
2. Check heart failure handbook and consult a health care provider
3. Checking taking medication ( )
4. Cooking ( )
5. Laundry ( )
6. Cleaning ( )
7. Put out the trash ( )
8. Toilet ( )
9. Bath ( )
11. Go up stairs ( )
12. Shopping ( )
13. Going out ( ) (  Walking alone  Cane/elderly car  Wheelchair  Bus/train  Taxi  Private car )

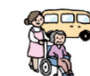

I=Independence, Support needs : F=Family ( ) N=Home nursing R=Home rehabilitation

P=Pharmacy H=Home helper D=Day care S=Skilled nursing home O=Others ( )

- Notes on daily life ( )
- Economic problems ( ) ◦ Cognitive function ( )
- Family structure and family information ( )
- Nursing care level ( ) Care providers ( )

## 5 Sharing advance care planning !

- Patient values ( )
- Surrogate decision maker ( )
- Treatment preferences ( )
- Preferred place of care (  home  hospital  skilled nursing home )

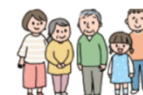

# Phase 1

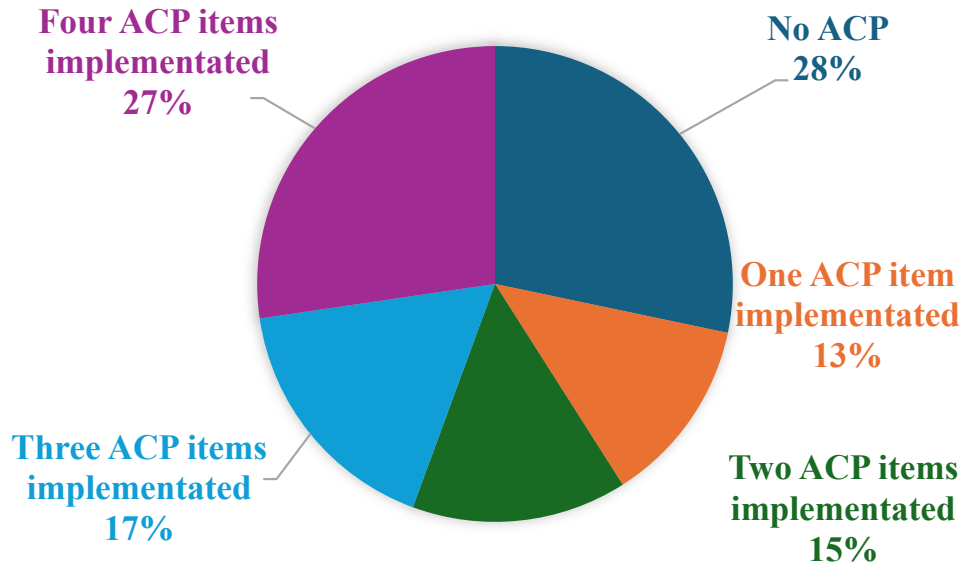

# Phase 2

P=0.01 for phase 1

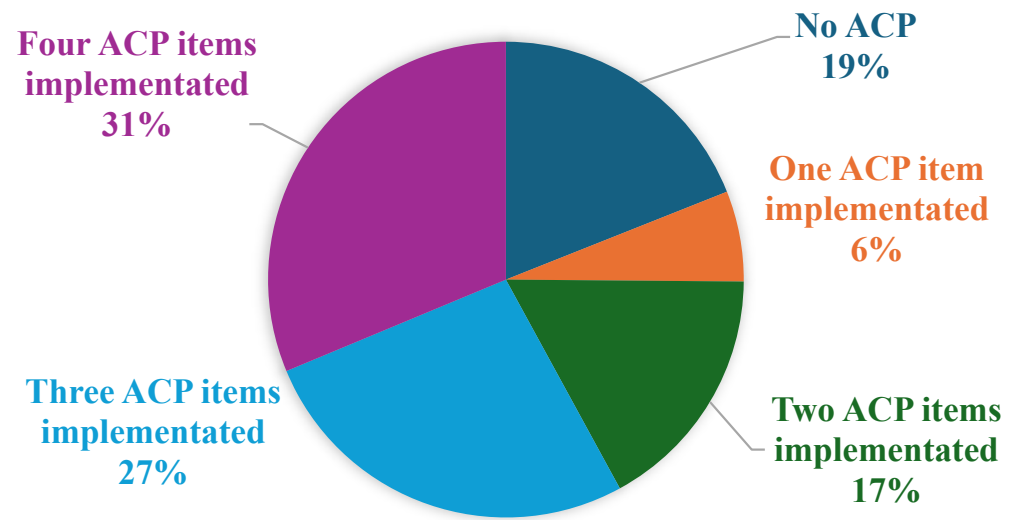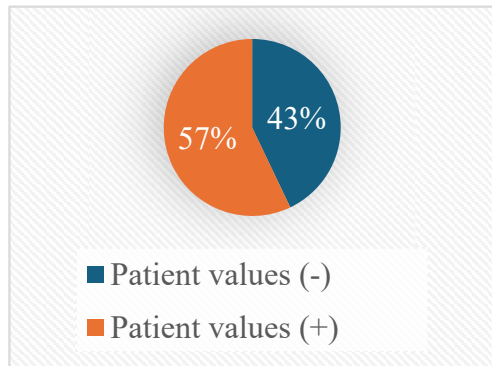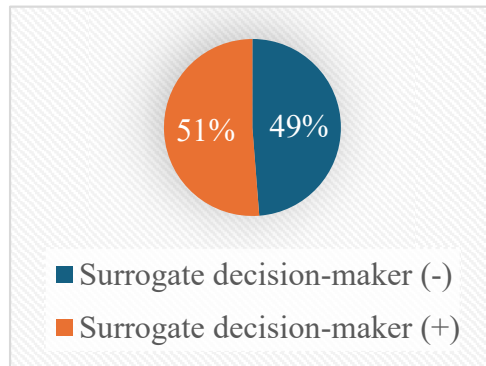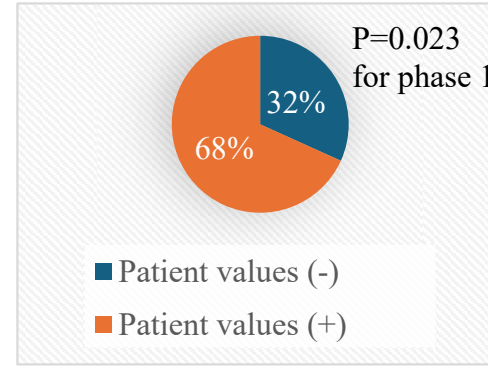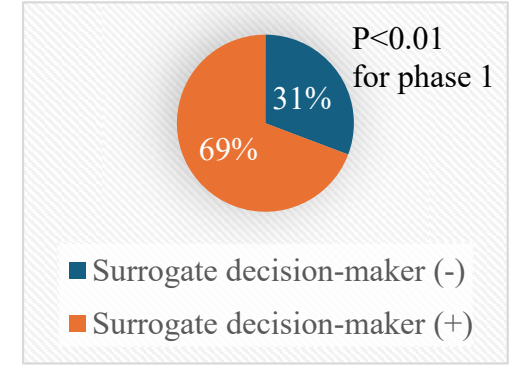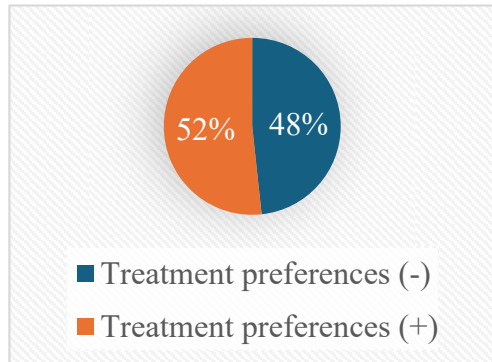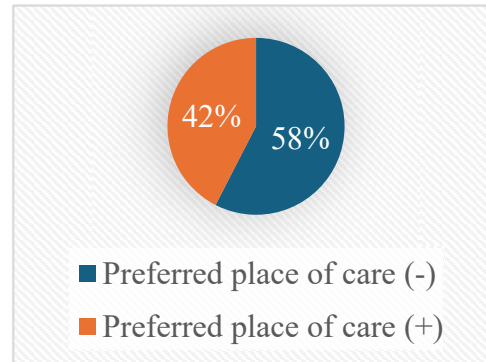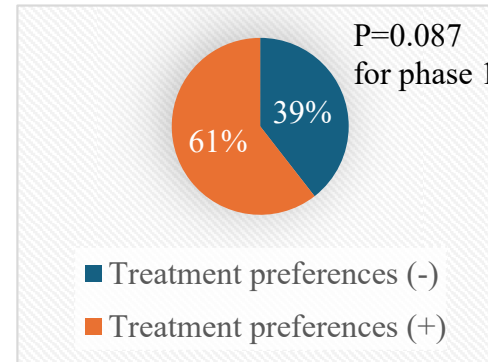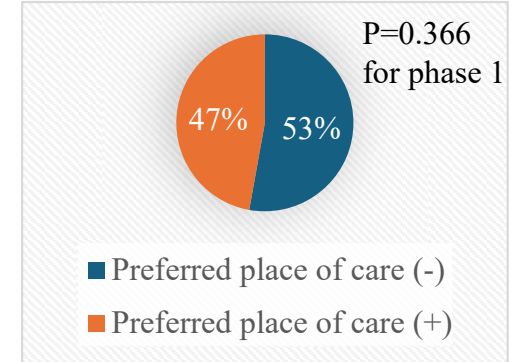

Supplementary Figure 3
